# Supplementary material for: Psychometric validation of an empowerment scale for Spanish-speaking patients with rheumatoid arthritis
Source: Springer Nature journal article supplement (doi:10.1186/s13075-018-1741-6), 2018-10-30
Supplement: MOESM1 [file 16238510]

**Table S1. Items head-to-head comparison between the S-HES and the RAEH.**

| <b>Sub-scales</b>                                  | <b>S-HES</b><br><b>Spanish/English item (1/subscale)</b>                              | <b>RAEH</b><br><b>Spanish/English item (1/subscale)</b>                                                                     |
|----------------------------------------------------|---------------------------------------------------------------------------------------|-----------------------------------------------------------------------------------------------------------------------------|
| Self-Control                                       | Sé muy bien con que parte(s) del cuidado de mi salud no estoy satisfecho              | Conozco bien con qué aspectos del cuidado de mi artritis reumatoide estoy insatisfecho                                      |
|                                                    | I know what part(s) of taking care of my health that I am dissatisfied with.          | I know what parts of taking care of my rheumatoid arthritis that I am dissatisfied with.                                    |
| Self-efficacy                                      | Soy capaz de alcanzar mis metas de salud mediante planes concretos de acción          | Soy capaz de alcanzar las metas que me he propuesto para mi artritis reumatoide mediante acciones concretas                 |
|                                                    | I am able to turn my health goals into a workable plan.                               | I am able to achieve my rheumatoid arthritis goals through concrete actions                                                 |
| Problem solving                                    | Tengo diferentes maneras de superar los obstáculos para lograr mis objetivos de salud | Puedo hacer diferentes cosas para superar los obstáculos y lograr las metas que me he propuesto para mi artritis reumatoide |
|                                                    | I can try out different ways of overcoming barriers to my health goals.               | I can try out different ways of overcoming barriers to achieve my rheumatoid arthritis goals.                               |
| Psychosocial coping/Cooping with emotional aspects | Tener salud me hace sentir mejor                                                      | Puedo encontrar maneras para sentirme bien teniendo artritis reumatoide                                                     |
|                                                    | I can find ways to feel better about having health.                                   | I can find ways to feel good having rheumatoid arthritis.                                                                   |
| Psychosocial coping/Stress management              | Puedo afrontar el estrés por mis problemas de salud de manera positiva                | Puedo afrontar de manera positiva el estrés que me causa la artritis reumatoide                                             |
|                                                    | I Know the positive ways I cope with health-related stress.                           | I can use positive ways to cope with rheumatoid arthritis-related stress.                                                   |
| Support                                            | Puedo solicitar ayuda para cuidar y mantener mi salud cuando lo necesito              | Puedo encontrar apoyo para cuidar de mi artritis reumatoide                                                                 |
|                                                    | I can ask for support for having and caring for my health when I need it.             | I can find support to care for my rheumatoid arthritis.                                                                     |

|                 |                                                                                           |                                                                                                          |
|-----------------|-------------------------------------------------------------------------------------------|----------------------------------------------------------------------------------------------------------|
| Motivation      | Reconozco lo que me motiva para cuidar mi salud                                           | Reconozco lo que me ayuda para estar motivado para cuidar de mi artritis reumatoide                      |
|                 | I know what helps me stay motivated to care for my health                                 | I recognize what helps me stay motivated to care for my rheumatoid arthritis.                            |
| Decision making | Me conozco lo suficiente para escoger lo que más conviene a mi salud                      | Me conozco lo suficiente para elegir lo que más me conviene para el cuidado de mi artritis reumatoide    |
|                 | I know enough about myself as a person to make health care choices that are right for me. | I know enough about myself to make rheumatoid arthritis care choices that are the most convenient to me. |
