# Supplementary material for: Psychometric validation of an empowerment scale for Spanish-speaking patients with rheumatoid arthritis
Source: Springer Nature journal article supplement (doi:10.1186/s13075-018-1741-6), 2018-10-30
Supplement: MOESM2 [file 16238510]

**Figure S1. Rheumatoid Arthritis Empowerment Scale for Hispanic patients (RAEH)**

**Validación de una escala para medición de empoderamiento en pacientes con artritis reumatoide del INCMNSZ.**

| <b>Escala de empoderamiento de artritis reumatoide</b>                                                                                                                                                                                                                                                             |                          |                          |                                     |                          |                          |
|--------------------------------------------------------------------------------------------------------------------------------------------------------------------------------------------------------------------------------------------------------------------------------------------------------------------|--------------------------|--------------------------|-------------------------------------|--------------------------|--------------------------|
| <b>Estimado paciente, le pedimos opine sobre los siguientes enunciados, al leerlos siempre ponga antes la frase “En general yo creo que”, luego elija de entre las opciones de la derecha, la que mejor refleje su acuerdo o desacuerdo y marque una sola respuesta por frase anotando una cruz en la casilla.</b> |                          |                          |                                     |                          |                          |
| <b>Ejemplo:</b> <input checked="" type="checkbox"/>                                                                                                                                                                                                                                                                |                          |                          |                                     |                          |                          |
| <b>En general, yo creo que...</b>                                                                                                                                                                                                                                                                                  | Muy de acuerdo<br>5      | De acuerdo<br>4          | Ni de acuerdo ni en desacuerdo<br>3 | En desacuerdo<br>2       | Muy en desacuerdo<br>1   |
| 1. Puedo afrontar de manera positiva el estrés que me causa la artritis reumatoide.                                                                                                                                                                                                                                | <input type="checkbox"/> | <input type="checkbox"/> | <input type="checkbox"/>            | <input type="checkbox"/> | <input type="checkbox"/> |
| 2. Puedo encontrar apoyo para cuidar de mi artritis reumatoide.                                                                                                                                                                                                                                                    | <input type="checkbox"/> | <input type="checkbox"/> | <input type="checkbox"/>            | <input type="checkbox"/> | <input type="checkbox"/> |
| 3. Reconozco lo que me ayuda a estar motivado para cuidar de mi artritis reumatoide.                                                                                                                                                                                                                               | <input type="checkbox"/> | <input type="checkbox"/> | <input type="checkbox"/>            | <input type="checkbox"/> | <input type="checkbox"/> |
| 4. Me conozco lo suficiente para elegir lo que más me conviene para el cuidado de mi artritis reumatoide.                                                                                                                                                                                                          | <input type="checkbox"/> | <input type="checkbox"/> | <input type="checkbox"/>            | <input type="checkbox"/> | <input type="checkbox"/> |
| 5. Conozco bien con que aspectos del cuidado de mi artritis reumatoide estoy insatisfecho.                                                                                                                                                                                                                         | <input type="checkbox"/> | <input type="checkbox"/> | <input type="checkbox"/>            | <input type="checkbox"/> | <input type="checkbox"/> |
| 6. Soy capaz de alcanzar las metas que me he propuesto para mi artritis reumatoide mediante acciones concretas.                                                                                                                                                                                                    | <input type="checkbox"/> | <input type="checkbox"/> | <input type="checkbox"/>            | <input type="checkbox"/> | <input type="checkbox"/> |
| 7. Puedo hacer diferentes cosas para superar los obstáculos y lograr las metas que me he propuesto para mi artritis reumatoide.                                                                                                                                                                                    | <input type="checkbox"/> | <input type="checkbox"/> | <input type="checkbox"/>            | <input type="checkbox"/> | <input type="checkbox"/> |
| 8. Puedo encontrar maneras para sentirme bien teniendo artritis reumatoide.                                                                                                                                                                                                                                        | <input type="checkbox"/> | <input type="checkbox"/> | <input type="checkbox"/>            | <input type="checkbox"/> | <input type="checkbox"/> |
