# Supplementary material for: Psychometric validation of an empowerment scale for Spanish-speaking patients with rheumatoid arthritis
Source: Springer Nature journal article supplement (doi:10.1186/s13075-018-1741-6), 2018-10-30
Supplement: MOESM3 [file 16238510]

**Table S2. Comparison of SWE-RES-23, S-HES and RAEH psychometric validation properties.**

|                                             | <b>SWE-RES-23</b>  | <b>S-HES</b>                      | <b>RAEH</b>                      |
|---------------------------------------------|--------------------|-----------------------------------|----------------------------------|
| Number of subscales/Number of items         | 5/23               | 8/8                               | 8/8                              |
| (Mean±SD) score for the sample <sup>1</sup> | 3.5±0.57           | 3.5±0.73                          | 4.2±0.57                         |
| Floor and ceiling effect, %                 | 2.2 and 15.1       | <20 and <20                       | 0.5 and 7.5                      |
| Cronbach $\alpha$                           | 0.920              | 0.890                             | 0.862                            |
| ICC (95%CI), p value                        | NA                 | 0.92 (NA), $\leq 0.001$           | 0.79 (0.62-0., $\leq 0.001$ )    |
| % of the explained variance                 | 64.1               | 52.4                              | 52                               |
| Kaiser-Meyer-Olkin sampling (KMO)           | 0.895              | 0.890                             | 0.884                            |
| Bartlett's test of sphericity, p value      | NA, $p \leq 0.001$ | $\chi^2=5425.72$ , $p \leq 0.001$ | $\chi^2=610.93$ , $p \leq 0.001$ |

IQ=Interquartile range; NA=not available. <sup>1</sup>Data available for the S-HES.
